# Supplementary material for: Progression-Free Survival versus Overall Survival in Patients with PSA-Recurrent Prostate Cancer: Long-Term Analysis of a Randomized Phase 2 Trial of pTVG-HP versus Placebo
Source: Research Square preprint supplement (doi:10.21203/rs.3.rs-8843559/v1), 2026-02-22
Supplement: Supplementary file 1 [file 13cb33193b7b8481c77769e7.docx]

**Supplemental Table 1:**

Subsequent therapies for patients in the long-term follow-up cohort.

| **Subject ID#** | **Treatment Assignment** | **Pre-tx PSA DT** |  | **No ADT** | **Treatments for castration-resistant disease** | | | | | | | | | | |
| --- | --- | --- | --- | --- | --- | --- | --- | --- | --- | --- | --- | --- | --- | --- | --- |
|  | None | Abiraterone | Enzalutamide | Apalutamide | Docetaxel | Cabazitaxel | Niraparib | Palliative radiation therapy | Radium 223 | Pluvicto | Other / Investigational |
| 100002 | P | <3 months |  |  |  | x |  |  | x |  |  |  |  |  |  |
| 100004 | P | <3 months |  |  |  |  | x |  |  |  |  |  |  |  |  |
| 100007 | P | <3 months |  |  |  |  |  |  |  |  |  | x |  |  |  |
| 100010 | P | <3 months |  |  |  |  | x |  | x | x |  | x | x | x | x |
| 400001 | P | <3 months |  |  |  | x | x |  | x |  | x |  | x |  |  |
| 700002 | P | <3 months |  |  |  |  | x |  |  |  |  | x |  |  |  |
| 700004 | P | <3 months |  |  |  |  | x |  | x |  |  |  |  |  | x |
| 700006 | P | <3 months |  |  |  |  | x |  | x | x |  | x |  | x | x |
| 700008 | P | <3 months |  |  |  | x | x |  |  |  |  |  |  |  | x |
| 200016 | P | 3-6 months | n/a |  |  |  |  |  |  |  |  |  |  |  |  |
| 200017 | P | 3-6 months |  |  |  | x |  |  |  |  |  |  |  |  |  |
| 200023 | P | 3-6 months |  |  | x |  |  |  |  |  |  |  |  |  |  |
| 500004 | P | 3-6 months |  |  |  | x | x |  |  |  | x |  |  |  |  |
| 800004 | P | 3-6 months |  |  | x |  |  |  |  |  |  |  |  |  |  |
| 800007 | P | 3-6 months |  |  |  |  |  |  |  |  |  | x |  |  |  |
| 800010 | P | 3-6 months |  |  |  |  | x |  | x |  |  | x |  |  | x |
| 800011 | P | 3-6 months |  |  |  | x | x |  |  |  |  | x |  |  |  |
| 1100001 | P | 3-6 months |  |  | x |  |  |  |  |  |  |  |  |  |  |
| 300002 | P | 6-12 months |  |  | x |  |  |  |  |  |  |  |  |  |  |
| 300006 | P | 6-12 months |  | x |  |  |  |  |  |  |  |  |  |  | x# |
| 300009 | P | 6-12 months | n/a |  |  |  |  |  |  |  |  |  |  |  |  |
| 300011 | P | 6-12 months |  |  |  |  |  |  |  |  |  |  |  |  |  |
| 300013 | P | 6-12 months |  |  |  |  | x |  |  |  |  |  |  |  |  |
| 300016 | P | 6-12 months |  |  |  | x |  |  |  |  |  |  |  |  |  |
| 300020 | P | 6-12 months |  |  | x |  |  |  |  |  |  |  |  |  |  |
| 300023 | P | 6-12 months |  |  |  |  | x |  |  |  |  |  |  |  |  |
| 600004 | P | 6-12 months | n/a |  |  |  |  |  |  |  |  |  |  |  |  |
| 900002 | P | 6-12 months |  |  |  |  | x |  |  |  |  |  |  | x |  |
| 900003 | P | 6-12 months |  | x |  |  |  |  |  |  |  |  |  |  |  |
|  |  |  |  |  |  |  |  |  |  |  |  |  |  |  |  |
| 100001 | V | <3 months |  |  | x |  |  |  |  |  |  |  |  |  |  |
| 100005 | V | <3 months |  |  |  |  | x |  |  |  |  |  |  |  |  |
| 100006 | V | <3 months |  |  |  |  |  |  |  |  |  | x |  |  |  |
| 100008 | V | <3 months |  |  |  |  | x |  | x | x |  | x | x | x | x |
| 700001 | V | <3 months |  |  |  | x |  |  | x | x |  |  |  |  | x |
| 700007 | V | <3 months |  |  |  |  |  |  | x |  |  |  |  |  |  |
| 1000002 | V | <3 months |  |  | x |  |  |  |  |  |  |  |  |  |  |
| 200001 | V | 3-6 months |  |  |  | x | x |  |  |  |  | x | x |  |  |
| 200003 | V | 3-6 months |  |  | x |  |  |  |  |  |  |  |  |  |  |
| 200006 | V | 3-6 months |  |  |  | x |  |  | x |  |  |  |  |  |  |
| 200008 | V | 3-6 months |  |  | x |  |  |  |  |  |  |  |  |  |  |
| 200009 | V | 3-6 months | n/a |  |  |  |  |  |  |  |  |  |  |  |  |
| 200015 | V | 3-6 months |  |  |  |  | x |  |  |  |  |  |  |  |  |
| 200018 | V | 3-6 months |  |  |  | x | x |  | x |  |  |  |  |  | x |
| 200019 | V | 3-6 months |  |  | x |  |  |  |  |  |  |  |  |  |  |
| 200021 | V | 3-6 months |  |  |  | x |  | x | x |  |  |  |  | x | x |
| 500001 | V | 3-6 months |  |  |  | x |  |  |  |  |  |  |  |  |  |
| 800001 | V | 3-6 months |  |  | x |  |  |  |  |  |  |  |  |  |  |
| 800002 | V | 3-6 months |  |  |  | x |  | x | x |  |  |  |  |  |  |
| 800009 | V | 3-6 months |  |  | x |  |  |  |  |  |  |  |  |  |  |
| 800012 | V | 3-6 months |  |  |  |  |  | x |  |  |  | x |  |  |  |
| 300001 | V | 6-12 months |  |  |  | x | x |  |  |  |  |  |  |  |  |
| 300004 | V | 6-12 months |  |  |  |  | x |  |  |  |  |  |  |  |  |
| 300005 | V | 6-12 months |  |  |  |  | x |  |  |  |  |  |  |  | x |
| 300008 | V | 6-12 months |  |  |  |  | x |  | x |  |  | x |  | x | x |
| 300010 | V | 6-12 months | n/a |  |  |  |  |  |  |  |  |  |  |  |  |
| 300012 | V | 6-12 months |  | x |  |  |  |  |  |  |  |  |  |  |  |
| 300014 | V | 6-12 months |  |  |  |  |  |  |  |  |  | x |  |  |  |
| 600001 | V | 6-12 months |  |  | x |  |  |  |  |  |  |  |  |  |  |
| 1200002 | V | 6-12 months |  |  |  |  | x |  |  |  |  |  |  |  |  |

# Patient developed biopsy-documented neuroendocrine tumor and received cisplatin and etoposide

n/a = incomplete long-term treatment data available

P = placebo

V = vaccine
